# Supplementary material for: A Transitional Gundi (Rodentia: Ctenodactylidae) from the Miocene of Israel
Source: PLoS One. 2016 Apr 6;11(4):e0151804. doi: 10.1371/journal.pone.0151804 (PMC4822958; doi:10.1371/journal.pone.0151804)
Supplement: S3 File — Character scoring: 0, 1, and 2, conditions of character;?, character state uncertain. (DOC) [file pone.0151804.s004.doc]

#NEXUS
[written Fri Nov 13 12:07:17 GMT 2015 by Mesquite  version 2.75 (build 564) at Raquel-PC/192.168.0.2]

BEGIN TAXA;
	TITLE Taxa;
	DIMENSIONS NTAX=26;
	TAXLABELS
		Karakoromys Tataromys Prosayimys__flynni Sardomys_dawsonae Pireddamys_rayi Sayimys_obliquidens Sayimys_giganteus Sayimys_baskini Sayimys_intermedius Sayimys_assarrarensis Sayimys_sivalensis Metasayimys_curvidens Africanomys_pulcher Africanomys_major Africanomys_minor Africanomys_cf._solignaci Proafricanomys_libanensis Irhoudia_robinsoni Irhoudia_bohlini Pellegrinia_panormensis Pectinator_spekei Ctenodactylus_gundi Ctenodactylus_vali Massoutiera_mzabi Felovia_vae Sayimys_negevensis 
	;

END;


BEGIN CHARACTERS;
	TITLE  Character_Matrix;
	DIMENSIONS  NCHAR=34;
	FORMAT DATATYPE = STANDARD GAP = - MISSING = ? SYMBOLS = "  0 1 2 3";
	MATRIX
	Karakoromys                00000000000000000000(0 1 2)0000000000101
	Tataromys                  2000000000000000000000000000000100
	Prosayimys__flynni         000?011110100000010010?00111000000
	Sardomys_dawsonae          201?0111101110000100200?????000000
	Pireddamys_rayi            201??????????0000100200??22200000?
	Sayimys_obliquidens        001?011110111000010010000111000000
	Sayimys_giganteus          1010021110111110010010?00111000000
	Sayimys_baskini            001?021110111110010020?00121101001
	Sayimys_intermedius        00100311101111210(0 1)0010?00111000000
	Sayimys_assarrarensis      001?0211101111100100?0?0011100000?
	Sayimys_sivalensis         001?0311101111210(0 1)0020?00222101001
	Metasayimys_curvidens      00100(2 3)1110110110010120000322102010
	Africanomys_pulcher        0010000200010110000010?11222102001
	Africanomys_major          0010000200010110000010?11222102001
	Africanomys_minor          001?0002000-0110000010011222102001
	Africanomys_cf._solignaci  001?001100???110000010?0022210200?
	Proafricanomys_libanensis  101?001100???1100100?0?0?222102001
	Irhoudia_robinsoni         102??????????121001020012???2120(0 1)?
	Irhoudia_bohlini           102?000200???121001020012???2120(0 1)0
	Pellegrinia_panormensis    212?---------?2-1011210-----203010
	Pectinator_spekei          10200002001101210001201223??203100
	Ctenodactylus_gundi        1121100?01???121101121022???203210
	Ctenodactylus_vali         1121100?01???121101121022???203210
	Massoutiera_mzabi          1121100-02---22-101121022---213010
	Felovia_vae                1121?00?0????121101121022???213010
	Sayimys_negevensis         001????1?????1100100?00?????001001

;

END;
BEGIN ASSUMPTIONS;
	TYPESET * UNTITLED   =  unord:  1 -  34;

END;

BEGIN MESQUITECHARMODELS;
	ProbModelSet * UNTITLED   =  'Mk1 (est.)':  1 -  34;
END;

Begin MESQUITE;
		MESQUITESCRIPTVERSION 2;
		TITLE AUTO;
		tell ProjectCoordinator;
		timeSaved 1447416437617;
		getEmployee #mesquite.minimal.ManageTaxa.ManageTaxa;
		tell It;
			setID 0 7422601701871227469;
		endTell;
		getEmployee #mesquite.charMatrices.ManageCharacters.ManageCharacters;
		tell It;
			setID 0 4363567251578914624;
			tell It;
				setDefaultOrder  0 1 2 3 4 5 6 33 7 8 9 10 11 12 13 14 15 16 17 18 19 20 21 22 23 24 25 26 27 28 29 30 31 32;
				attachments ;
			endTell;
			mqVersion 275;
			checksumv 0 3 3241386878 null  getNumChars 34 numChars 34 getNumTaxa 26 numTaxa 26   short true   bits 15   states 15   sumSquaresStatesOnly 3798.0 sumSquares 3798.0 longCompressibleToShort false usingShortMatrix true   NumFiles 1 NumMatrices 1;
			mqVersion;
		endTell;
		getWindow;
		tell It;
			suppress;
			setResourcesState false false 100;
			setPopoutState 400;
			setExplanationSize 0;
			setAnnotationSize 0;
			setFontIncAnnot 0;
			setFontIncExp 0;
			setSize 1366 650;
			setLocation -8 0;
			setFont SanSerif;
			setFontSize 10;
			getToolPalette;
			tell It;
			endTell;
			desuppress;
		endTell;
		getEmployee  #mesquite.charMatrices.BasicDataWindowCoord.BasicDataWindowCoord;
		tell It;
			showDataWindow #4363567251578914624 #mesquite.charMatrices.BasicDataWindowMaker.BasicDataWindowMaker;
			tell It;
				getWindow;
				tell It;
					setExplanationSize 30;
					setAnnotationSize 20;
					setFontIncAnnot 0;
					setFontIncExp 0;
					setSize 1266 583;
					setLocation -8 0;
					setFont SanSerif;
					setFontSize 10;
					getToolPalette;
					tell It;
						setTool mesquite.charMatrices.BasicDataWindowMaker.BasicDataWindow.ibeam;
					endTell;
					setActive;
					setTool mesquite.charMatrices.BasicDataWindowMaker.BasicDataWindow.ibeam;
					colorCells  #mesquite.charMatrices.NoColor.NoColor;
					colorRowNames  #mesquite.charMatrices.TaxonGroupColor.TaxonGroupColor;
					colorColumnNames  #mesquite.charMatrices.CharGroupColor.CharGroupColor;
					colorText  #mesquite.charMatrices.NoColor.NoColor;
					setBackground White;
					toggleShowNames on;
					toggleShowTaxonNames on;
					toggleTight off;
					toggleThinRows off;
					toggleShowChanges on;
					toggleSeparateLines off;
					toggleShowStates on;
					toggleAutoWCharNames on;
					toggleAutoTaxonNames off;
					toggleShowDefaultCharNames off;
					toggleConstrainCW on;
					toggleBirdsEye off;
					toggleShowPaleGrid off;
					toggleShowPaleCellColors off;
					togglePaleInapplicable on;
					toggleShowBoldCellText off;
					toggleAllowAutosize on;
					toggleColorsPanel off;
					toggleDiagonal on;
					setDiagonalHeight 80;
					toggleLinkedScrolling on;
					toggleScrollLinkedTables off;
				endTell;
				showWindow;
				getWindow;
				tell It;
					forceAutosize;
				endTell;
				getEmployee #mesquite.charMatrices.ColorByState.ColorByState;
				tell It;
					setStateLimit 9;
					toggleUniformMaximum on;
				endTell;
				getEmployee #mesquite.charMatrices.ColorCells.ColorCells;
				tell It;
					setColor Red;
					removeColor off;
				endTell;
				getEmployee #mesquite.categ.StateNamesStrip.StateNamesStrip;
				tell It;
					showStrip off;
				endTell;
				getEmployee #mesquite.charMatrices.AnnotPanel.AnnotPanel;
				tell It;
					togglePanel off;
				endTell;
				getEmployee #mesquite.charMatrices.CharReferenceStrip.CharReferenceStrip;
				tell It;
					showStrip off;
				endTell;
				getEmployee #mesquite.charMatrices.QuickKeySelector.QuickKeySelector;
				tell It;
					autotabOff;
				endTell;
				getEmployee #mesquite.charMatrices.SelSummaryStrip.SelSummaryStrip;
				tell It;
					showStrip off;
				endTell;
				getEmployee #mesquite.categ.SmallStateNamesEditor.SmallStateNamesEditor;
				tell It;
					panelOpen true;
				endTell;
			endTell;
		endTell;
		endTell;
end;
